# Supplementary material for: Combination of an E-Nose and an E-Tongue for Adulteration Detection of Minced Mutton Mixed with Pork
Source: Hindawi journal article supplement (doi:10.1155/2019/4342509), 2019-04-16
Supplement: f1 [file 4342509.f1.docx]

Raw data of E-nose and E-tongue response to mutton adulterated with 40% pork were shown in table 1 and 2, they were used to plot figure 1 and 2. The stable responses of E-nose at 75th s and E-tongue at 120th s for all the samples were shown in table 3, and the data set were used for optimizing of fusion methods for E-nose and E-tongue. For prediction of pork content in adulterated mutton, the fusion data set containing 6 PCs of E-nose and 5 PCs of E-tongue were extracted and used, and the data set were shown in table 4.

Table 1 typical response of E-nose to mutton adulterated with 40% pork

| time | S1 | S2 | S3 | S4 | S5 | S6 | S7 | S8 | S9 | S10 |
| --- | --- | --- | --- | --- | --- | --- | --- | --- | --- | --- |
| 0 | 1.0081 | 0.9944 | 1.0076 | 0.9992 | 1.0056 | 0.9954 | 0.9968 | 1.0054 | 1.0002 | 1.0015 |
| 1 | 1.0024 | 0.9937 | 1.002 | 1.0018 | 1.0014 | 0.9991 | 0.9985 | 1.0004 | 1.0002 | 0.9998 |
| 2 | 1.0024 | 0.9924 | 1.0026 | 1.0034 | 1.0021 | 0.9996 | 0.9988 | 0.9984 | 1.0006 | 0.9998 |
| 3 | 1.0038 | 0.9911 | 1.0028 | 1.0021 | 1.0026 | 0.9995 | 0.998 | 0.9963 | 1 | 0.9995 |
| 4 | 1.0034 | 0.9903 | 1.0031 | 1.003 | 1.0028 | 0.9997 | 0.9982 | 0.9971 | 1 | 0.9997 |
| 5 | 1.0041 | 0.9881 | 1.0037 | 1.0023 | 1.0032 | 0.9988 | 0.9976 | 0.9975 | 0.9999 | 0.9998 |
| 6 | 1.0048 | 0.9864 | 1.0042 | 1.0018 | 1.0047 | 0.9975 | 0.9969 | 0.9996 | 0.9999 | 1.0003 |
| 7 | 1.0041 | 0.9869 | 1.0054 | 1.0014 | 1.0065 | 0.9969 | 0.9971 | 0.9934 | 0.9996 | 0.9992 |
| 8 | 1.0062 | 0.9882 | 1.0054 | 1.0014 | 1.0082 | 0.9956 | 0.9968 | 0.9942 | 1.0001 | 0.9999 |
| 9 | 1.0069 | 0.9892 | 1.0061 | 1.0025 | 1.0091 | 0.995 | 0.9973 | 0.9906 | 0.9997 | 0.9995 |
| 10 | 1.0062 | 0.9911 | 1.0065 | 1.0005 | 1.01 | 0.9944 | 0.9972 | 0.9938 | 0.9998 | 0.999 |
| 11 | 1.0062 | 0.993 | 1.0072 | 1.0016 | 1.011 | 0.9933 | 0.9969 | 0.9901 | 1 | 0.9994 |
| 12 | 1.0062 | 0.9944 | 1.0083 | 1.0007 | 1.0124 | 0.9925 | 0.9972 | 0.9856 | 1.0007 | 1 |
| 13 | 1.0079 | 0.9966 | 1.0086 | 1.0016 | 1.0131 | 0.9918 | 0.9975 | 0.9873 | 1.0001 | 0.9997 |
| 14 | 1.0062 | 0.9993 | 1.0085 | 0.9998 | 1.0119 | 0.9915 | 0.9975 | 0.9914 | 1.0007 | 1 |
| 15 | 0.9986 | 1.0052 | 1.0011 | 1.0007 | 0.9966 | 0.9963 | 0.9977 | 0.9967 | 1.0014 | 0.9992 |
| 16 | 0.9832 | 1.014 | 0.9869 | 1.0007 | 0.9671 | 1.0069 | 0.9984 | 1.0107 | 1.0016 | 0.9994 |
| 17 | 0.9665 | 1.0228 | 0.9709 | 1.0011 | 0.9385 | 1.0194 | 0.9985 | 1.0284 | 1.0017 | 0.9989 |
| 18 | 0.9505 | 1.0318 | 0.9568 | 1.0005 | 0.9148 | 1.0312 | 0.9987 | 1.0508 | 1.0021 | 0.999 |
| 19 | 0.9359 | 1.0404 | 0.9449 | 1.0007 | 0.8956 | 1.0418 | 0.9989 | 1.0698 | 1.0025 | 0.999 |
| 20 | 0.9241 | 1.0484 | 0.934 | 1.0005 | 0.8801 | 1.0501 | 0.9994 | 1.0848 | 1.003 | 0.9992 |
| 21 | 0.9139 | 1.056 | 0.9253 | 1.0002 | 0.8673 | 1.058 | 0.9999 | 1.1031 | 1.0033 | 0.9998 |
| 22 | 0.9045 | 1.0636 | 0.9177 | 1.0014 | 0.857 | 1.0653 | 1.0005 | 1.1156 | 1.0034 | 0.9998 |
| 23 | 0.8954 | 1.0707 | 0.9103 | 1.0005 | 0.8486 | 1.0717 | 1.0007 | 1.129 | 1.0039 | 1.0002 |
| 24 | 0.8886 | 1.0784 | 0.9041 | 1 | 0.8412 | 1.0763 | 1.0016 | 1.1415 | 1.0041 | 1 |
| 25 | 0.8816 | 1.0857 | 0.8986 | 1.0014 | 0.8353 | 1.0821 | 1.0013 | 1.1507 | 1.0044 | 0.9999 |
| 26 | 0.8745 | 1.0926 | 0.8935 | 1.0002 | 0.8302 | 1.0859 | 1.0019 | 1.1616 | 1.0043 | 1.0003 |
| 27 | 0.8691 | 1.0987 | 0.8888 | 1.0002 | 0.8256 | 1.0897 | 1.0025 | 1.1705 | 1.0051 | 1.0006 |
| 28 | 0.8638 | 1.1058 | 0.8849 | 0.9998 | 0.822 | 1.0939 | 1.0026 | 1.1784 | 1.0053 | 1.0001 |
| 29 | 0.8601 | 1.1122 | 0.8809 | 1.0002 | 0.8185 | 1.0974 | 1.0029 | 1.1864 | 1.0063 | 1.0002 |
| 30 | 0.8557 | 1.1181 | 0.8771 | 1.0002 | 0.8155 | 1.1002 | 1.0035 | 1.197 | 1.0058 | 1.0012 |
| 31 | 0.8504 | 1.1244 | 0.8743 | 1.0009 | 0.813 | 1.1028 | 1.0039 | 1.1978 | 1.0061 | 1.0016 |
| 32 | 0.847 | 1.1305 | 0.8703 | 1.0023 | 0.8107 | 1.1046 | 1.0042 | 1.1999 | 1.006 | 1.0016 |
| 33 | 0.8433 | 1.136 | 0.8679 | 1.0021 | 0.8083 | 1.1076 | 1.0044 | 1.2105 | 1.0067 | 1.001 |
| 34 | 0.8407 | 1.1414 | 0.8645 | 1.0014 | 0.8065 | 1.1102 | 1.0049 | 1.2189 | 1.0073 | 1.0011 |
| 35 | 0.837 | 1.1474 | 0.8627 | 1.0016 | 0.8042 | 1.1121 | 1.0053 | 1.2244 | 1.0072 | 1.0008 |
| 36 | 0.8343 | 1.1527 | 0.8595 | 1.0018 | 0.8026 | 1.1142 | 1.0059 | 1.2274 | 1.0072 | 1.0008 |
| 37 | 0.8313 | 1.1594 | 0.8579 | 1.0005 | 0.8009 | 1.1155 | 1.0062 | 1.2274 | 1.0074 | 0.9999 |
| 38 | 0.8283 | 1.1648 | 0.8554 | 1.0016 | 0.7993 | 1.1176 | 1.0067 | 1.2354 | 1.0086 | 1.0006 |
| 39 | 0.8263 | 1.1708 | 0.8529 | 1.0037 | 0.7985 | 1.1211 | 1.0071 | 1.2418 | 1.0085 | 1.0009 |
| 40 | 0.8243 | 1.1759 | 0.851 | 1.0018 | 0.797 | 1.1224 | 1.0075 | 1.2486 | 1.0093 | 1.0018 |
| 41 | 0.8213 | 1.1806 | 0.8496 | 1.0009 | 0.7956 | 1.1243 | 1.008 | 1.2558 | 1.0088 | 1.0022 |
| 42 | 0.8203 | 1.1859 | 0.8474 | 1.0021 | 0.7952 | 1.1249 | 1.0084 | 1.2515 | 1.0097 | 1.0019 |
| 43 | 0.819 | 1.1901 | 0.8463 | 1.0018 | 0.7937 | 1.1249 | 1.0089 | 1.2554 | 1.0099 | 1.0023 |
| 44 | 0.8157 | 1.1946 | 0.8447 | 1.0021 | 0.7929 | 1.1263 | 1.0094 | 1.2617 | 1.0095 | 1.0011 |
| 45 | 0.815 | 1.1993 | 0.8429 | 1.0018 | 0.7921 | 1.1263 | 1.0101 | 1.263 | 1.0097 | 1.0015 |
| 46 | 0.8127 | 1.2036 | 0.8417 | 1.0014 | 0.7915 | 1.127 | 1.0101 | 1.2651 | 1.0101 | 1 |
| 47 | 0.8103 | 1.2077 | 0.84 | 1.0014 | 0.7905 | 1.1274 | 1.0108 | 1.2673 | 1.0108 | 1.0001 |
| 48 | 0.808 | 1.2124 | 0.839 | 1.0014 | 0.7902 | 1.1282 | 1.0112 | 1.2749 | 1.011 | 1.0006 |
| 49 | 0.8077 | 1.2167 | 0.838 | 1.0011 | 0.7896 | 1.1283 | 1.0118 | 1.2749 | 1.0109 | 1.001 |
| 50 | 0.8077 | 1.2209 | 0.8366 | 1.0002 | 0.7888 | 1.1297 | 1.0119 | 1.2758 | 1.0108 | 1.0011 |
| 51 | 0.8057 | 1.2257 | 0.8352 | 1.0007 | 0.7878 | 1.1304 | 1.0124 | 1.2753 | 1.0111 | 1.0002 |
| 52 | 0.803 | 1.2292 | 0.8341 | 1.0007 | 0.7872 | 1.1319 | 1.0127 | 1.2817 | 1.0117 | 1.0003 |
| 53 | 0.8027 | 1.2335 | 0.8329 | 1.0011 | 0.7866 | 1.1321 | 1.013 | 1.2834 | 1.0115 | 1.0002 |
| 54 | 0.802 | 1.237 | 0.8319 | 1.0005 | 0.7861 | 1.1331 | 1.014 | 1.2869 | 1.0117 | 1 |
| 55 | 0.8004 | 1.2415 | 0.8308 | 1.0021 | 0.7854 | 1.1344 | 1.0143 | 1.2877 | 1.0116 | 1 |
| 56 | 0.799 | 1.2445 | 0.8306 | 0.9996 | 0.7852 | 1.1341 | 1.0146 | 1.286 | 1.0113 | 0.9999 |
| 57 | 0.798 | 1.2482 | 0.8292 | 1.0002 | 0.7849 | 1.1341 | 1.0149 | 1.2805 | 1.0129 | 0.9997 |
| 58 | 0.7974 | 1.2515 | 0.8284 | 0.9998 | 0.7843 | 1.1346 | 1.0153 | 1.2826 | 1.0123 | 0.999 |
| 59 | 0.796 | 1.2541 | 0.8281 | 1.0005 | 0.7837 | 1.1354 | 1.0161 | 1.2881 | 1.0132 | 0.9992 |
| 60 | 0.796 | 1.2575 | 0.8269 | 1.0002 | 0.7837 | 1.135 | 1.0159 | 1.2898 | 1.0124 | 0.9995 |
| 61 | 0.7951 | 1.2599 | 0.8263 | 1.0002 | 0.7835 | 1.1364 | 1.0169 | 1.2941 | 1.0127 | 1 |
| 62 | 0.7931 | 1.2633 | 0.8257 | 1.0005 | 0.7831 | 1.1366 | 1.0174 | 1.2945 | 1.0129 | 0.9993 |
| 63 | 0.7931 | 1.2661 | 0.825 | 0.9989 | 0.7825 | 1.1375 | 1.0174 | 1.292 | 1.0128 | 1 |
| 64 | 0.7924 | 1.269 | 0.8244 | 1 | 0.7824 | 1.138 | 1.0179 | 1.2962 | 1.014 | 1.0001 |
| 65 | 0.7914 | 1.2717 | 0.8236 | 1.0005 | 0.7818 | 1.1376 | 1.0184 | 1.2937 | 1.0137 | 0.9994 |
| 66 | 0.7907 | 1.2742 | 0.8234 | 1.0002 | 0.7813 | 1.1382 | 1.0189 | 1.2962 | 1.014 | 1.0001 |
| 67 | 0.7897 | 1.2759 | 0.8221 | 0.9998 | 0.7812 | 1.1386 | 1.019 | 1.2928 | 1.0135 | 0.9998 |
| 68 | 0.7894 | 1.2784 | 0.8217 | 1 | 0.781 | 1.1383 | 1.0195 | 1.2992 | 1.0139 | 0.9997 |
| 69 | 0.7888 | 1.2815 | 0.8216 | 1.0007 | 0.7807 | 1.139 | 1.0198 | 1.2984 | 1.0142 | 0.9998 |
| 70 | 0.7884 | 1.284 | 0.8205 | 0.9998 | 0.7804 | 1.1394 | 1.0204 | 1.2984 | 1.0145 | 0.9995 |
| 71 | 0.7864 | 1.2862 | 0.8203 | 0.9993 | 0.78 | 1.1392 | 1.0204 | 1.2988 | 1.0142 | 0.9998 |
| 72 | 0.7871 | 1.2881 | 0.8199 | 1 | 0.7798 | 1.1403 | 1.0211 | 1.3005 | 1.0148 | 0.9989 |
| 73 | 0.7871 | 1.2903 | 0.8195 | 1.0009 | 0.7796 | 1.1403 | 1.0213 | 1.2984 | 1.0149 | 0.9993 |
| 74 | 0.7858 | 1.2919 | 0.8187 | 1.0014 | 0.7796 | 1.1408 | 1.0219 | 1.3039 | 1.0144 | 0.9995 |
| 75 | 0.7854 | 1.2937 | 0.8184 | 1.0014 | 0.7791 | 1.1412 | 1.0222 | 1.3082 | 1.0148 | 1.0002 |
| 76 | 0.7851 | 1.2958 | 0.8178 | 1.0005 | 0.7787 | 1.1418 | 1.0223 | 1.3116 | 1.015 | 1.001 |
| 77 | 0.7844 | 1.2981 | 0.8176 | 1.0009 | 0.7789 | 1.1426 | 1.0229 | 1.3112 | 1.015 | 1.0011 |
| 78 | 0.7848 | 1.3002 | 0.817 | 1.0009 | 0.7783 | 1.1431 | 1.0232 | 1.3048 | 1.0159 | 1.0016 |
| 79 | 0.7831 | 1.3025 | 0.8166 | 1.0021 | 0.7781 | 1.1435 | 1.0236 | 1.3065 | 1.0153 | 1.0012 |
| 80 | 0.7835 | 1.304 | 0.8164 | 1.0011 | 0.7778 | 1.1438 | 1.024 | 1.3095 | 1.0157 | 1.0023 |

Table 2 typical response of E-tongue to mutton adulterated with 40% pork

| Time/s | ZZ | BA | BB | CA | GA | HA | JB |
| --- | --- | --- | --- | --- | --- | --- | --- |
| 0 | 2642.776 | 153.4653 | 1696.966 | 2781.292 | 2106.41 | 1015.068 | 3294.165 |
| 2 | 2642.471 | 164.1438 | 1720.154 | 2774.274 | 2099.393 | 1003.779 | 3281.656 |
| 4 | 2641.251 | 175.7376 | 1730.832 | 2771.223 | 2091.461 | 1000.423 | 3278.91 |
| 6 | 2640.946 | 189.4671 | 1740.29 | 2765.426 | 2085.969 | 997.0668 | 3273.723 |
| 8 | 2639.115 | 203.5017 | 1743.952 | 2764.511 | 2082.002 | 991.575 | 3265.485 |
| 10 | 2637.59 | 216.3159 | 1750.359 | 2761.765 | 2081.392 | 987.3036 | 3263.655 |
| 12 | 2636.979 | 230.6556 | 1756.461 | 2764.206 | 2081.392 | 986.0832 | 3262.129 |
| 14 | 2637.59 | 242.5545 | 1761.342 | 2760.24 | 2077.426 | 982.7271 | 3264.875 |
| 16 | 2637.895 | 254.4534 | 1764.393 | 2762.07 | 2078.341 | 982.7271 | 3263.655 |
| 18 | 2637.59 | 264.5217 | 1769.275 | 2757.799 | 2076.206 | 980.2863 | 3264.265 |
| 20 | 2636.064 | 276.7257 | 1769.885 | 2759.63 | 2075.9 | 980.2863 | 3263.655 |
| 22 | 2635.149 | 287.7093 | 1777.208 | 2758.409 | 2072.239 | 980.8965 | 3263.96 |
| 24 | 2636.369 | 296.2521 | 1775.072 | 2758.409 | 2069.493 | 979.0659 | 3267.316 |
| 26 | 2634.233 | 307.2357 | 1778.123 | 2759.63 | 2071.324 | 976.32 | 3263.35 |
| 28 | 2634.233 | 315.1683 | 1779.343 | 2759.63 | 2071.324 | 976.6251 | 3266.401 |
| 30 | 2634.233 | 325.8468 | 1780.259 | 2759.63 | 2070.104 | 973.5741 | 3263.35 |
| 32 | 2632.708 | 332.559 | 1780.869 | 2757.189 | 2069.798 | 974.4894 | 3264.265 |
| 34 | 2632.403 | 341.1018 | 1784.225 | 2759.019 | 2065.527 | 975.0996 | 3264.875 |
| 36 | 2633.928 | 350.2548 | 1780.259 | 2759.63 | 2069.493 | 977.5404 | 3263.655 |
| 38 | 2631.793 | 355.4415 | 1780.869 | 2759.019 | 2065.832 | 973.269 | 3262.434 |
| 40 | 2631.488 | 363.6792 | 1779.343 | 2755.968 | 2065.527 | 970.218 | 3262.129 |
| 42 | 2630.267 | 373.1373 | 1782.394 | 2756.273 | 2066.442 | 973.5741 | 3263.35 |
| 44 | 2629.352 | 376.4934 | 1780.869 | 2759.019 | 2065.222 | 972.3537 | 3263.35 |
| 46 | 2629.047 | 381.0699 | 1782.394 | 2757.799 | 2064.002 | 972.6588 | 3265.485 |
| 48 | 2630.572 | 392.0535 | 1783.31 | 2758.104 | 2064.612 | 969.3027 | 3263.35 |
| 50 | 2629.047 | 394.1892 | 1783.31 | 2758.104 | 2060.951 | 971.7435 | 3263.35 |
| 52 | 2627.826 | 401.2065 | 1783.615 | 2757.494 | 2062.781 | 968.3874 | 3263.96 |
| 54 | 2627.826 | 407.9187 | 1784.835 | 2756.579 | 2059.425 | 970.8282 | 3264.875 |
| 56 | 2625.386 | 411.5799 | 1782.089 | 2755.053 | 2056.984 | 965.6415 | 3264.875 |
| 58 | 2625.996 | 418.9023 | 1779.953 | 2755.358 | 2057.9 | 971.7435 | 3263.96 |
| 60 | 2629.352 | 424.6992 | 1782.089 | 2755.663 | 2056.069 | 969.3027 | 3266.096 |
| 62 | 2625.386 | 429.2757 | 1780.259 | 2755.663 | 2056.069 | 969.3027 | 3265.485 |
| 64 | 2625.386 | 433.5471 | 1783.31 | 2756.273 | 2055.459 | 968.3874 | 3265.79 |
| 66 | 2624.775 | 438.4287 | 1780.869 | 2754.748 | 2050.882 | 970.5231 | 3263.045 |
| 68 | 2626.606 | 446.3613 | 1780.869 | 2754.443 | 2052.713 | 968.3874 | 3264.875 |
| 70 | 2623.86 | 447.8868 | 1782.089 | 2753.528 | 2050.272 | 968.9976 | 3264.57 |
| 72 | 2625.691 | 453.0735 | 1779.343 | 2754.138 | 2048.747 | 970.8282 | 3265.485 |
| 74 | 2622.64 | 455.8194 | 1780.259 | 2755.968 | 2046.611 | 969.3027 | 3263.35 |
| 76 | 2623.25 | 457.9551 | 1778.733 | 2753.528 | 2049.357 | 966.8619 | 3267.316 |
| 78 | 2623.25 | 463.752 | 1779.343 | 2753.833 | 2047.831 | 968.0823 | 3264.265 |
| 80 | 2624.47 | 463.1418 | 1778.428 | 2755.663 | 2045.085 | 966.5568 | 3263.655 |
| 82 | 2620.504 | 467.4132 | 1779.648 | 2756.579 | 2044.475 | 972.6588 | 3266.096 |
| 84 | 2624.47 | 471.6846 | 1778.428 | 2754.748 | 2044.475 | 969.9129 | 3264.875 |
| 86 | 2618.978 | 477.4815 | 1780.259 | 2754.748 | 2045.696 | 965.6415 | 3262.129 |
| 88 | 2621.114 | 479.9223 | 1780.869 | 2753.833 | 2040.204 | 968.9976 | 3264.265 |
| 90 | 2620.199 | 482.9733 | 1780.564 | 2754.748 | 2040.509 | 963.8109 | 3264.875 |
| 92 | 2619.284 | 482.6682 | 1781.174 | 2755.358 | 2038.983 | 965.6415 | 3262.434 |
| 94 | 2618.063 | 489.0753 | 1778.733 | 2758.104 | 2039.899 | 966.2517 | 3264.57 |
| 96 | 2619.284 | 493.3467 | 1779.343 | 2755.663 | 2038.983 | 964.116 | 3263.655 |
| 98 | 2615.622 | 497.0079 | 1779.648 | 2754.443 | 2037.153 | 964.4211 | 3266.096 |
| 100 | 2619.284 | 500.364 | 1777.208 | 2752.307 | 2036.848 | 962.8956 | 3265.18 |
| 102 | 2617.758 | 502.4997 | 1777.818 | 2754.748 | 2036.237 | 964.7262 | 3264.57 |
| 104 | 2617.453 | 506.7711 | 1775.682 | 2755.358 | 2033.797 | 966.8619 | 3264.265 |
| 106 | 2618.978 | 507.6864 | 1777.818 | 2754.748 | 2036.237 | 966.8619 | 3264.875 |
| 108 | 2617.453 | 511.9578 | 1773.241 | 2754.748 | 2033.492 | 965.0313 | 3263.655 |
| 110 | 2617.148 | 511.0425 | 1778.733 | 2753.528 | 2031.966 | 964.116 | 3264.875 |
| 112 | 2615.622 | 519.2802 | 1778.428 | 2753.222 | 2033.797 | 965.6415 | 3265.79 |
| 114 | 2615.012 | 518.9751 | 1776.292 | 2755.358 | 2032.881 | 964.116 | 3264.57 |
| 116 | 2616.538 | 518.9751 | 1775.682 | 2752.307 | 2031.356 | 959.8446 | 3267.011 |
| 118 | 2615.622 | 522.6363 | 1774.767 | 2755.358 | 2030.135 | 960.7599 | 3261.214 |
| 120 | 2613.792 | 525.6873 | 1772.631 | 2754.138 | 2029.83 | 960.7599 | 3265.79 |

Table 3 Stable response of E-nose at 75th s and E-tongue at 120th s for all the samples

| Group | 75th s response of E-nose | | | | | | | | | | 120th s response of E-tongue | | | | | | |
| --- | --- | --- | --- | --- | --- | --- | --- | --- | --- | --- | --- | --- | --- | --- | --- | --- | --- |
| S1 | S2 | S3 | S4 | S5 | S6 | S7 | S8 | S9 | S10 | ZZ | BA | BB | CA | GA | HA | JB |
| pork | 0.6813 | 1.4057 | 0.6965 | 1.0026 | 0.6413 | 1.2095 | 1.0217 | 1.6423 | 1.0182 | 0.9958 | 1096.835 | 398.4606 | 1286.912 | 957.7089 | 940.3182 | 636.4386 | 3261.519 |
| pork | 0.6541 | 1.4899 | 0.6678 | 1.0004 | 0.6203 | 1.2604 | 1.0344 | 1.8002 | 1.0219 | 0.9977 | 1177.991 | 325.2366 | 1310.099 | 975.0996 | 957.4038 | 623.0142 | 3258.773 |
| pork | 0.6322 | 1.5568 | 0.6406 | 0.9996 | 0.5851 | 1.3065 | 1.0366 | 1.8667 | 1.0247 | 1.0001 | 1246.334 | 269.7084 | 1329.321 | 991.2699 | 969.3027 | 614.7765 | 3265.18 |
| pork | 0.6631 | 1.462 | 0.6763 | 1.0038 | 0.6209 | 1.2576 | 1.0291 | 1.7601 | 1.0193 | 0.9986 | 1304.608 | 213.8751 | 1345.796 | 1006.22 | 981.2016 | 612.9459 | 3264.57 |
| pork | 0.6205 | 1.5786 | 0.6342 | 0.9987 | 0.601 | 1.3341 | 1.0448 | 1.8869 | 1.026 | 1.001 | 1445.259 | 134.5491 | 1388.815 | 1051.985 | 1018.729 | 623.9295 | 3265.79 |
| pork | 0.6704 | 1.4599 | 0.6898 | 1.002 | 0.6414 | 1.2337 | 1.031 | 1.698 | 1.0209 | 0.9995 | 1517.262 | 91.2249 | 1411.698 | 1085.546 | 1037.035 | 630.9468 | 3269.147 |
| pork | 0.6638 | 1.4788 | 0.6777 | 0.9996 | 0.6259 | 1.2444 | 1.0321 | 1.7133 | 1.0225 | 1.0015 | 1401.629 | 156.8214 | 1375.391 | 1038.866 | 1006.525 | 612.3357 | 3273.723 |
| pork | 0.7051 | 1.3837 | 0.7214 | 1.0018 | 0.6685 | 1.2145 | 1.0249 | 1.5806 | 1.0175 | 1.0007 | 1483.091 | 112.887 | 1398.578 | 1070.596 | 1026.662 | 623.9295 | 3273.418 |
| pork | 0.6609 | 1.4855 | 0.6741 | 1.0036 | 0.6229 | 1.2696 | 1.0324 | 1.7575 | 1.0211 | 1.0009 | 1550.518 | 83.5974 | 1415.969 | 1103.547 | 1041.611 | 628.2009 | 3271.892 |
| pork | 0.638 | 1.5418 | 0.6508 | 1.0081 | 0.596 | 1.2822 | 1.0352 | 1.8298 | 1.0246 | 0.9995 | 1645.099 | 46.6803 | 1434.275 | 1150.532 | 1064.799 | 644.9814 | 3277.384 |
| pork | 0.6567 | 1.4949 | 0.6662 | 1.0002 | 0.6085 | 1.2592 | 1.0317 | 1.7491 | 1.0219 | 1.0028 | 1583.469 | 55.2231 | 1419.935 | 1115.751 | 1051.68 | 635.8284 | 3280.435 |
| pork | 0.6321 | 1.5443 | 0.6394 | 1.0048 | 0.5847 | 1.2956 | 1.0337 | 1.8703 | 1.0242 | 1.0017 | 1675.304 | 39.663 | 1444.343 | 1163.651 | 1073.952 | 653.5242 | 3277.384 |
| pork | 0.6609 | 1.4803 | 0.6752 | 1.0057 | 0.6221 | 1.2558 | 1.0289 | 1.7603 | 1.0207 | 1.0011 | 1702.763 | 35.6967 | 1451.361 | 1174.635 | 1078.834 | 654.1344 | 3277.689 |
| pork | 0.6459 | 1.5133 | 0.6608 | 1.0023 | 0.6079 | 1.2567 | 1.0325 | 1.7974 | 1.0215 | 1.0024 | 1810.463 | 0.9153 | 1482.176 | 1236.57 | 1099.886 | 670.3047 | 3279.825 |
| pork | 0.6823 | 1.4073 | 0.6968 | 1.0038 | 0.6422 | 1.2403 | 1.0315 | 1.6462 | 1.0178 | 1.0018 | 1832.736 | 4.5765 | 1487.973 | 1246.334 | 1112.09 | 682.5087 | 3284.402 |
| pork | 0.6512 | 1.4924 | 0.6645 | 1.0075 | 0.6098 | 1.257 | 1.0315 | 1.7884 | 1.021 | 1.0013 | 1757.681 | 14.6448 | 1476.684 | 1216.129 | 1104.462 | 677.9322 | 3290.198 |
| pork | 0.6564 | 1.4927 | 0.6653 | 1.0065 | 0.6101 | 1.2592 | 1.0332 | 1.7856 | 1.0219 | 1.0016 | 1887.044 | 3.9663 | 1502.007 | 1276.538 | 1116.056 | 689.2209 | 3285.317 |
| pork | 0.6671 | 1.4689 | 0.6773 | 1.0004 | 0.6204 | 1.2456 | 1.0317 | 1.7086 | 1.0209 | 1.0042 | 1786.666 | -2.4408 | 1493.159 | 1231.689 | 1109.649 | 677.0169 | 3289.893 |
| pork | 0.7027 | 1.3708 | 0.7174 | 1.0056 | 0.6532 | 1.2116 | 1.0232 | 1.5839 | 1.0163 | 1.0034 | 1934.944 | -3.3561 | 1528.551 | 1302.472 | 1130.396 | 702.3402 | 3285.622 |
| pork | 0.6527 | 1.5047 | 0.665 | 1.0027 | 0.6132 | 1.2719 | 1.0343 | 1.8212 | 1.0224 | 1.0055 | 1911.452 | -6.102 | 1520.008 | 1287.827 | 1125.819 | 696.2382 | 3291.419 |
| 80% of pork | 0.8524 | 1.2272 | 0.8764 | 0.9996 | 0.8455 | 1.0842 | 1.0222 | 1.174 | 1.0121 | 0.9985 | 1249.69 | -2.7459 | 1299.116 | 1311.32 | 1085.241 | 752.3766 | 3265.18 |
| 80% of pork | 0.9137 | 1.198 | 0.9358 | 0.9984 | 0.9197 | 1.0414 | 1.0206 | 1.0768 | 1.0128 | 0.9986 | 1175.245 | -4.2714 | 1273.182 | 1311.625 | 1080.969 | 756.9531 | 3274.638 |
| 80% of pork | 0.8584 | 1.2256 | 0.8868 | 0.9993 | 0.8572 | 1.0773 | 1.0205 | 1.1596 | 1.0131 | 0.9991 | 1314.676 | -7.0173 | 1323.524 | 1321.998 | 1091.343 | 756.648 | 3267.316 |
| 80% of pork | 0.8494 | 1.2239 | 0.8778 | 0.9991 | 0.8502 | 1.0785 | 1.0175 | 1.155 | 1.0124 | 0.9994 | 1373.255 | -19.5264 | 1343.66 | 1335.118 | 1098.36 | 755.7327 | 3267.011 |
| 80% of pork | 0.8471 | 1.2257 | 0.8712 | 0.9996 | 0.8386 | 1.0867 | 1.0197 | 1.1799 | 1.0129 | 0.9994 | 1474.243 | -25.0182 | 1382.103 | 1350.068 | 1108.428 | 757.2582 | 3277.079 |
| 80% of pork | 0.8392 | 1.2353 | 0.8681 | 0.9995 | 0.84 | 1.0895 | 1.0232 | 1.1821 | 1.0132 | 0.9995 | 1525.5 | -10.3734 | 1403.155 | 1365.933 | 1123.378 | 767.3265 | 3274.943 |
| 80% of pork | 0.8477 | 1.2268 | 0.8753 | 0.9991 | 0.8444 | 1.0873 | 1.0231 | 1.1811 | 1.0126 | 0.9999 | 1567.909 | -21.0519 | 1407.426 | 1361.051 | 1116.056 | 759.699 | 3272.198 |
| 80% of pork | 0.8479 | 1.2327 | 0.8719 | 1.0005 | 0.8409 | 1.0924 | 1.0238 | 1.2018 | 1.0131 | 0.9995 | 1607.267 | -20.1366 | 1422.681 | 1369.899 | 1120.327 | 758.1735 | 3270.977 |
| 80% of pork | 0.8491 | 1.2294 | 0.8752 | 0.9996 | 0.8441 | 1.0868 | 1.0203 | 1.1881 | 1.0134 | 1 | 1684.152 | -27.7641 | 1445.564 | 1384.239 | 1133.141 | 764.8857 | 3270.977 |
| 80% of pork | 0.8416 | 1.2295 | 0.871 | 0.9998 | 0.8394 | 1.086 | 1.0209 | 1.1776 | 1.0126 | 1 | 1719.544 | -22.2723 | 1457.158 | 1392.782 | 1134.362 | 768.852 | 3273.723 |
| 80% of pork | 0.8504 | 1.2204 | 0.8752 | 1.0027 | 0.8407 | 1.0909 | 1.0193 | 1.1729 | 1.0121 | 0.999 | 1788.191 | -7.3224 | 1476.989 | 1414.139 | 1153.583 | 781.9713 | 3278.605 |
| 80% of pork | 0.8498 | 1.2395 | 0.8758 | 1.0007 | 0.848 | 1.0878 | 1.023 | 1.1667 | 1.0151 | 0.9995 | 1754.02 | -13.1193 | 1467.226 | 1405.291 | 1141.989 | 776.4795 | 3283.181 |
| 80% of pork | 0.9388 | 1.1665 | 0.961 | 1 | 0.9567 | 1.0211 | 1.0177 | 1.0352 | 1.0105 | 0.999 | 1817.481 | -9.7632 | 1479.735 | 1416.274 | 1153.888 | 773.7336 | 3278.3 |
| 80% of pork | 0.843 | 1.2324 | 0.8705 | 0.9987 | 0.8354 | 1.089 | 1.0214 | 1.1891 | 1.0136 | 1.001 | 1849.211 | -18.306 | 1490.108 | 1432.445 | 1158.16 | 779.5305 | 3278.91 |
| 80% of pork | 0.9042 | 1.2379 | 0.9295 | 1.0002 | 0.9097 | 1.0478 | 1.0135 | 1.0835 | 1.0156 | 1.0001 | 1909.926 | -21.0519 | 1506.889 | 1448.92 | 1167.923 | 785.9376 | 3279.52 |
| 80% of pork | 0.85 | 1.2324 | 0.8748 | 0.9987 | 0.8476 | 1.0875 | 1.0178 | 1.1805 | 1.0145 | 1.0024 | 1964.234 | -7.6275 | 1526.11 | 1467.836 | 1180.432 | 797.5314 | 3282.876 |
| 80% of pork | 0.859 | 1.229 | 0.8869 | 1.0043 | 0.8545 | 1.0772 | 1.0216 | 1.1614 | 1.0135 | 1.0015 | 2017.321 | 0.9153 | 1530.382 | 1484.617 | 1188.975 | 794.1753 | 3281.351 |
| 80% of pork | 0.8391 | 1.237 | 0.8656 | 1.0038 | 0.8348 | 1.0915 | 1.0226 | 1.2038 | 1.0135 | 1.002 | 1991.388 | -6.4071 | 1531.907 | 1474.853 | 1181.652 | 792.0396 | 3282.876 |
| 80% of pork | 0.9357 | 1.156 | 0.9596 | 1.0027 | 0.9383 | 1.0213 | 1.0161 | 1.0354 | 1.0103 | 1.0022 | 1938.911 | -16.4754 | 1516.042 | 1457.463 | 1171.889 | 791.7345 | 3288.673 |
| 80% of pork | 0.9356 | 1.157 | 0.9595 | 1.0028 | 0.9373 | 1.0213 | 1.0165 | 1.0359 | 1.0133 | 1.0032 | 2042.645 | -7.9326 | 1547.772 | 1496.516 | 1191.11 | 801.1926 | 3287.758 |
| 60% of pork | 0.8056 | 1.2725 | 0.8385 | 0.9989 | 0.8004 | 1.1213 | 1.0211 | 1.2796 | 1.0108 | 0.995 | 1165.787 | -61.3251 | 1290.573 | 1447.394 | 1111.479 | 838.7199 | 3249.62 |
| 60% of pork | 0.7997 | 1.2647 | 0.8325 | 0.9959 | 0.793 | 1.1187 | 1.0192 | 1.273 | 1.0104 | 1.0003 | 1241.452 | -69.5628 | 1310.405 | 1440.377 | 1110.259 | 820.719 | 3247.484 |
| 60% of pork | 0.8342 | 1.2739 | 0.8636 | 1.0018 | 0.8283 | 1.0987 | 1.0235 | 1.2242 | 1.0113 | 0.9977 | 1310.099 | -80.5464 | 1334.202 | 1448.005 | 1114.225 | 820.719 | 3246.874 |
| 60% of pork | 0.819 | 1.2629 | 0.8518 | 0.9989 | 0.8155 | 1.1144 | 1.0192 | 1.2332 | 1.012 | 0.9992 | 1430.614 | -86.3433 | 1372.035 | 1451.361 | 1114.225 | 818.5833 | 3244.739 |
| 60% of pork | 0.8112 | 1.2497 | 0.8442 | 0.997 | 0.8034 | 1.1147 | 1.0187 | 1.2448 | 1.0114 | 1.0005 | 1480.955 | -82.9872 | 1388.815 | 1455.632 | 1122.768 | 817.9731 | 3249.315 |
| 60% of pork | 0.8284 | 1.2306 | 0.8587 | 0.9989 | 0.8197 | 1.1033 | 1.0168 | 1.1952 | 1.0095 | 1.0002 | 1529.466 | -83.5974 | 1406.511 | 1461.124 | 1125.209 | 815.8374 | 3248.095 |
| 60% of pork | 0.8181 | 1.257 | 0.8525 | 0.9995 | 0.8138 | 1.1102 | 1.0184 | 1.2446 | 1.0118 | 1.0006 | 1571.57 | -83.9025 | 1418.105 | 1461.429 | 1123.988 | 806.9895 | 3245.349 |
| 60% of pork | 0.8148 | 1.2547 | 0.8467 | 1.0005 | 0.8107 | 1.113 | 1.0169 | 1.2377 | 1.0115 | 1.0008 | 1658.829 | -79.6311 | 1443.428 | 1473.633 | 1129.175 | 815.2272 | 3247.79 |
| 60% of pork | 0.83 | 1.2735 | 0.8633 | 1 | 0.8261 | 1.0923 | 1.0212 | 1.2281 | 1.0121 | 1.0007 | 1731.137 | -80.8515 | 1461.429 | 1484.922 | 1136.498 | 814.3119 | 3246.264 |
| 60% of pork | 0.7893 | 1.2846 | 0.8256 | 0.9993 | 0.7839 | 1.1299 | 1.0179 | 1.3124 | 1.0117 | 1.0022 | 1617.335 | -84.2076 | 1433.665 | 1472.413 | 1127.955 | 813.0915 | 3259.078 |
| 60% of pork | 0.808 | 1.2785 | 0.8404 | 1.0011 | 0.8005 | 1.118 | 1.0258 | 1.2581 | 1.0136 | 1.0013 | 1867.517 | -67.4271 | 1503.228 | 1513.601 | 1150.837 | 819.1935 | 3248.4 |
| 60% of pork | 0.8136 | 1.2667 | 0.8476 | 1.0005 | 0.8079 | 1.1109 | 1.0201 | 1.2353 | 1.0132 | 1.0021 | 1836.092 | -64.3761 | 1494.99 | 1500.177 | 1151.142 | 811.566 | 3250.23 |
| 60% of pork | 0.823 | 1.2704 | 0.852 | 1.0007 | 0.8129 | 1.1081 | 1.0211 | 1.2468 | 1.0133 | 1.0026 | 1900.163 | -64.071 | 1515.127 | 1516.042 | 1162.431 | 819.4986 | 3249.62 |
| 60% of pork | 0.8192 | 1.2616 | 0.851 | 1.0014 | 0.8112 | 1.1077 | 1.0194 | 1.2728 | 1.012 | 1.0029 | 1770.495 | -76.5801 | 1483.396 | 1499.261 | 1152.363 | 830.1771 | 3265.79 |
| 60% of pork | 0.7836 | 1.3523 | 0.8222 | 1.0007 | 0.7881 | 1.1361 | 1.0254 | 1.2971 | 1.0146 | 1.0035 | 1800.7 | -66.8169 | 1486.142 | 1500.787 | 1151.753 | 816.7527 | 3263.655 |
| 60% of pork | 0.8178 | 1.27 | 0.8513 | 1.003 | 0.808 | 1.1101 | 1.021 | 1.2197 | 1.012 | 1.0026 | 1933.114 | -73.8342 | 1527.331 | 1524.28 | 1163.651 | 820.719 | 3254.197 |
| 60% of pork | 0.8158 | 1.2679 | 0.8484 | 1.0034 | 0.8058 | 1.1136 | 1.021 | 1.2321 | 1.0132 | 1.0036 | 2040.814 | -47.2905 | 1558.756 | 1545.637 | 1179.212 | 823.77 | 3252.671 |
| 60% of pork | 0.7964 | 1.2879 | 0.8303 | 1.0023 | 0.7937 | 1.13 | 1.0223 | 1.2656 | 1.0127 | 1.0043 | 2067.968 | -47.2905 | 1570.35 | 1557.841 | 1184.093 | 828.9567 | 3251.451 |
| 60% of pork | 0.8056 | 1.275 | 0.8387 | 1.0016 | 0.7983 | 1.1223 | 1.0231 | 1.2578 | 1.0139 | 1.0051 | 2095.732 | -46.6803 | 1578.282 | 1566.078 | 1189.585 | 832.3128 | 3250.841 |
| 60% of pork | 0.8123 | 1.2714 | 0.8489 | 1.0037 | 0.8076 | 1.1138 | 1.0201 | 1.2508 | 1.0133 | 1.0108 | 2016.406 | -50.0364 | 1555.095 | 1541.67 | 1174.635 | 827.4312 | 3265.79 |
| 40% of pork | 0.7845 | 1.3067 | 0.8191 | 0.9984 | 0.7756 | 1.1318 | 1.0223 | 1.2903 | 1.0124 | 0.9954 | 1399.494 | -24.408 | 1285.386 | 1567.299 | 1191.11 | 871.3656 | 3239.552 |
| 40% of pork | 0.7994 | 1.301 | 0.8309 | 0.9993 | 0.7875 | 1.1193 | 1.0206 | 1.3428 | 1.0118 | 0.9967 | 1457.768 | -30.51 | 1318.642 | 1572.791 | 1192.636 | 867.3993 | 3245.044 |
| 40% of pork | 0.8517 | 1.2498 | 0.882 | 0.9977 | 0.8431 | 1.0831 | 1.0197 | 1.167 | 1.0104 | 0.9976 | 1511.465 | -25.0182 | 1334.202 | 1571.875 | 1179.822 | 857.9412 | 3239.247 |
| 40% of pork | 0.8544 | 1.2526 | 0.8819 | 0.9991 | 0.8382 | 1.0816 | 1.0124 | 1.2072 | 1.0106 | 0.9982 | 1563.943 | -44.8497 | 1355.559 | 1574.316 | 1174.33 | 857.331 | 3237.416 |
| 40% of pork | 0.8112 | 1.2968 | 0.8467 | 1.0002 | 0.8036 | 1.1043 | 1.0202 | 1.2749 | 1.0121 | 0.9981 | 1652.422 | -26.5437 | 1399.189 | 1584.079 | 1177.686 | 859.7718 | 3238.026 |
| 40% of pork | 0.7707 | 1.3651 | 0.8069 | 1.0007 | 0.7669 | 1.1429 | 1.0254 | 1.3283 | 1.0143 | 0.9984 | 1694.525 | -22.5774 | 1414.444 | 1589.571 | 1179.822 | 863.433 | 3240.162 |
| 40% of pork | 0.7954 | 1.2891 | 0.8277 | 0.9995 | 0.7904 | 1.1279 | 1.0218 | 1.2713 | 1.0135 | 1 | 1736.934 | -22.5774 | 1428.173 | 1600.555 | 1181.957 | 866.1789 | 3240.467 |
| 40% of pork | 0.8225 | 1.2753 | 0.8559 | 0.9982 | 0.8124 | 1.1031 | 1.0203 | 1.2075 | 1.0119 | 1.0003 | 1775.072 | -25.0182 | 1447.394 | 1607.572 | 1190.5 | 864.6534 | 3242.908 |
| 40% of pork | 0.7921 | 1.3701 | 0.8273 | 0.9984 | 0.7951 | 1.1342 | 1.0166 | 1.3219 | 1.0166 | 1.0009 | 1810.158 | -24.7131 | 1457.768 | 1612.454 | 1188.365 | 860.382 | 3239.857 |
| 40% of pork | 0.8055 | 1.2973 | 0.8379 | 1.0039 | 0.7966 | 1.1169 | 1.0203 | 1.2668 | 1.0121 | 1.001 | 1942.877 | -18.6111 | 1503.533 | 1633.811 | 1197.518 | 867.0942 | 3241.077 |
| 40% of pork | 0.809 | 1.3355 | 0.8411 | 1.0002 | 0.8019 | 1.1164 | 1.0216 | 1.3126 | 1.0154 | 1.0024 | 1910.231 | -17.3907 | 1494.075 | 1626.183 | 1192.331 | 863.7381 | 3243.823 |
| 40% of pork | 0.795 | 1.3207 | 0.8299 | 1.0036 | 0.7892 | 1.1274 | 1.0228 | 1.3521 | 1.0165 | 1.0014 | 1885.823 | -22.5774 | 1491.329 | 1633.505 | 1204.84 | 879.2982 | 3253.586 |
| 40% of pork | 0.8146 | 1.3261 | 0.8434 | 1.0045 | 0.8024 | 1.1201 | 1.0202 | 1.3116 | 1.0163 | 1.0019 | 2035.932 | -9.153 | 1537.399 | 1653.337 | 1209.722 | 867.0942 | 3238.026 |
| 40% of pork | 0.7798 | 1.3131 | 0.8123 | 1.0009 | 0.7733 | 1.1452 | 1.0257 | 1.3185 | 1.0163 | 1.0037 | 2007.253 | -10.9836 | 1527.026 | 1647.845 | 1202.399 | 870.4503 | 3242.298 |
| 40% of pork | 0.7784 | 1.3029 | 0.8096 | 1.0014 | 0.7709 | 1.1446 | 1.0206 | 1.3111 | 1.0129 | 1.004 | 2060.951 | -14.9499 | 1548.993 | 1661.27 | 1212.162 | 862.5177 | 3243.823 |
| 40% of pork | 0.8114 | 1.3369 | 0.8444 | 1.002 | 0.8009 | 1.1187 | 1.026 | 1.31 | 1.0173 | 1.0042 | 2141.192 | 2.4408 | 1569.434 | 1682.932 | 1220.095 | 870.4503 | 3241.688 |
| 40% of pork | 0.7542 | 1.3625 | 0.7915 | 1.0018 | 0.7555 | 1.1647 | 1.029 | 1.3605 | 1.0173 | 1.0054 | 2115.258 | 0.9153 | 1559.366 | 1677.44 | 1217.959 | 867.0942 | 3245.349 |
| 40% of pork | 0.8287 | 1.3003 | 0.8616 | 1.0011 | 0.8301 | 1.1011 | 1.0215 | 1.2692 | 1.0149 | 1.0052 | 2167.736 | 6.4071 | 1581.944 | 1690.254 | 1224.977 | 868.3146 | 3244.739 |
| 40% of pork | 0.8718 | 1.2761 | 0.9083 | 1.0034 | 0.9034 | 1.0606 | 1.025 | 1.1093 | 1.0145 | 1.0038 | 2217.162 | 11.5938 | 1599.029 | 1705.204 | 1233.519 | 874.1115 | 3242.298 |
| 40% of pork | 0.8119 | 1.2595 | 0.8445 | 1.0034 | 0.7952 | 1.1142 | 1.0187 | 1.2393 | 1.0136 | 1.0057 | 2089.325 | -10.3734 | 1566.078 | 1678.965 | 1224.366 | 877.7727 | 3255.417 |
| 40% of pork | 0.7793 | 1.4259 | 0.8129 | 0.9989 | 0.7663 | 1.1298 | 1.0276 | 1.3511 | 1.0145 | 0.9962 | 1550.518 | 37.2222 | 1296.37 | 1718.628 | 1268.911 | 911.6388 | 3258.163 |
| 40% of pork | 0.7631 | 1.4145 | 0.8002 | 0.9982 | 0.7539 | 1.1366 | 1.025 | 1.3515 | 1.016 | 0.9989 | 1595.978 | 30.8151 | 1319.863 | 1710.086 | 1248.164 | 897.6042 | 3254.197 |
| 40% of pork | 0.7608 | 1.4479 | 0.7953 | 0.9982 | 0.7461 | 1.1417 | 1.0293 | 1.4154 | 1.0178 | 0.9999 | 1649.676 | 30.51 | 1341.22 | 1711.001 | 1243.283 | 899.7399 | 3258.468 |
| 40% of pork | 0.7758 | 1.3748 | 0.8067 | 1.0021 | 0.7595 | 1.1418 | 1.0262 | 1.3861 | 1.0171 | 0.9986 | 1692.085 | 18.9162 | 1364.102 | 1720.764 | 1239.011 | 898.5195 | 3260.909 |
| 40% of pork | 0.7735 | 1.3852 | 0.8052 | 0.9993 | 0.7564 | 1.1333 | 1.022 | 1.4201 | 1.0152 | 0.9999 | 1774.767 | 30.2049 | 1411.393 | 1733.273 | 1247.554 | 908.5878 | 3261.214 |
| 40% of pork | 0.774 | 1.4009 | 0.8083 | 1.0011 | 0.7624 | 1.1377 | 1.0253 | 1.3488 | 1.0148 | 0.9994 | 1809.243 | 32.6457 | 1421.156 | 1724.73 | 1236.875 | 891.5022 | 3260.604 |
| 40% of pork | 0.778 | 1.4913 | 0.8137 | 1.0007 | 0.7698 | 1.1316 | 1.0281 | 1.3965 | 1.0194 | 0.9998 | 1882.772 | 33.2559 | 1452.276 | 1736.934 | 1233.214 | 893.6379 | 3253.892 |
| 40% of pork | 0.7648 | 1.4069 | 0.7998 | 0.9998 | 0.7516 | 1.1449 | 1.0244 | 1.3873 | 1.0167 | 1.0007 | 1846.16 | 28.3743 | 1435.19 | 1728.086 | 1230.468 | 891.1971 | 3259.994 |
| 40% of pork | 0.7737 | 1.3896 | 0.8097 | 1.0018 | 0.7625 | 1.1372 | 1.025 | 1.3467 | 1.0171 | 1 | 1917.248 | 34.1712 | 1466.006 | 1735.714 | 1234.74 | 892.7226 | 3258.468 |
| 40% of pork | 0.7891 | 1.4173 | 0.8183 | 1.0005 | 0.7687 | 1.1273 | 1.0269 | 1.3499 | 1.0171 | 1.0009 | 1978.574 | 40.5783 | 1489.803 | 1755.851 | 1239.011 | 898.8246 | 3256.943 |
| 40% of pork | 0.7828 | 1.3529 | 0.8166 | 1.003 | 0.7714 | 1.1332 | 1.0224 | 1.3511 | 1.0153 | 1.0002 | 2095.122 | 45.765 | 1539.84 | 1774.157 | 1246.334 | 892.7226 | 3253.586 |
| 40% of pork | 0.7874 | 1.3787 | 0.819 | 1.0011 | 0.7698 | 1.1304 | 1.0234 | 1.3368 | 1.0148 | 1.0011 | 2010.914 | 37.8324 | 1508.414 | 1759.817 | 1247.554 | 899.4348 | 3266.401 |
| 40% of pork | 0.7788 | 1.3842 | 0.8109 | 1.0044 | 0.7621 | 1.1392 | 1.0251 | 1.3598 | 1.0165 | 1.0005 | 2036.543 | 44.2395 | 1512.686 | 1760.732 | 1246.334 | 889.3665 | 3264.265 |
| 40% of pork | 0.7785 | 1.4114 | 0.8113 | 1.0027 | 0.7644 | 1.13 | 1.027 | 1.3666 | 1.0167 | 1.0016 | 2064.307 | 44.8497 | 1526.415 | 1766.834 | 1243.893 | 891.1971 | 3262.434 |
| 40% of pork | 0.7773 | 1.3751 | 0.8122 | 1.0014 | 0.7679 | 1.1352 | 1.0254 | 1.3498 | 1.0151 | 1.0027 | 2147.599 | 42.1038 | 1559.976 | 1783.004 | 1250.91 | 889.0614 | 3261.214 |
| 40% of pork | 0.7657 | 1.4009 | 0.7986 | 1.0016 | 0.7489 | 1.1396 | 1.0245 | 1.2366 | 1.0173 | 1.0027 | 2173.532 | 56.7486 | 1575.231 | 1787.886 | 1252.436 | 891.1971 | 3257.553 |
| 40% of pork | 0.7618 | 1.4284 | 0.8006 | 1.0032 | 0.7512 | 1.1413 | 1.0284 | 1.2245 | 1.0182 | 1.0028 | 2199.466 | 66.2067 | 1586.825 | 1799.48 | 1256.402 | 894.8583 | 3264.875 |
| 40% of pork | 0.7717 | 1.4215 | 0.8054 | 1.0025 | 0.755 | 1.1406 | 1.0275 | 1.2506 | 1.018 | 1.0035 | 2268.724 | 75.6648 | 1627.098 | 1811.074 | 1264.334 | 886.3155 | 3255.417 |
| 40% of pork | 0.7767 | 1.378 | 0.8109 | 1.003 | 0.7635 | 1.1371 | 1.0228 | 1.3251 | 1.0157 | 1.0035 | 2245.841 | 76.5801 | 1613.369 | 1801.921 | 1260.063 | 887.2308 | 3261.824 |
| 40% of pork | 0.7753 | 1.429 | 0.8069 | 1.0023 | 0.7588 | 1.1364 | 1.0272 | 1.3501 | 1.0183 | 1.0043 | 2290.386 | 80.5464 | 1640.523 | 1822.362 | 1264.64 | 887.841 | 3263.35 |
| mutton | 0.7553 | 1.612 | 0.7911 | 1 | 0.7468 | 1.1496 | 1.0327 | 1.1608 | 1.0201 | 0.997 | 1117.886 | 15.8652 | 1296.37 | 1554.79 | 1109.039 | 763.3602 | 3241.688 |
| mutton | 0.7685 | 1.5187 | 0.7998 | 1.0027 | 0.7549 | 1.1418 | 1.029 | 1.4513 | 1.0214 | 0.9989 | 1201.179 | 7.9326 | 1322.609 | 1556.315 | 1120.632 | 761.8347 | 3238.331 |
| mutton | 0.7606 | 1.6099 | 0.7861 | 1.0002 | 0.739 | 1.1502 | 1.0397 | 1.4349 | 1.0235 | 1 | 1271.657 | 8.8479 | 1351.288 | 1556.315 | 1123.378 | 755.1225 | 3235.586 |
| mutton | 0.7624 | 1.6109 | 0.7946 | 1.0053 | 0.7451 | 1.147 | 1.0374 | 1.2613 | 1.0238 | 0.9984 | 1339.084 | -14.0346 | 1381.798 | 1555.095 | 1121.853 | 774.6489 | 3232.84 |
| mutton | 0.7588 | 1.5286 | 0.7863 | 1.0039 | 0.7374 | 1.1484 | 1.0288 | 1.4628 | 1.0211 | 0.9997 | 1449.53 | -0.6102 | 1423.902 | 1559.061 | 1141.379 | 763.6653 | 3239.247 |
| mutton | 0.7704 | 1.4954 | 0.7963 | 1.005 | 0.7467 | 1.1432 | 1.0308 | 1.4584 | 1.021 | 0.9994 | 1498.651 | -8.5428 | 1441.598 | 1564.553 | 1146.566 | 752.9868 | 3234.365 |
| mutton | 0.7712 | 1.5663 | 0.7978 | 1.0055 | 0.7498 | 1.1421 | 1.0362 | 1.4423 | 1.0248 | 0.9991 | 1543.806 | -3.9663 | 1457.158 | 1558.146 | 1152.058 | 766.1061 | 3236.806 |
| mutton | 0.7462 | 1.6329 | 0.7788 | 1.0016 | 0.7335 | 1.1547 | 1.0401 | 1.4359 | 1.0241 | 1.0008 | 1590.791 | -10.0683 | 1469.667 | 1561.807 | 1160.906 | 793.5651 | 3237.111 |
| mutton | 0.767 | 1.6151 | 0.8029 | 0.9986 | 0.7618 | 1.1499 | 1.0315 | 1.3303 | 1.0223 | 1.0021 | 1631.065 | -10.3734 | 1484.006 | 1564.858 | 1165.177 | 791.7345 | 3235.891 |
| mutton | 0.7722 | 1.5662 | 0.8012 | 1.0012 | 0.752 | 1.139 | 1.0332 | 1.3751 | 1.0208 | 1.0012 | 1708.865 | -12.5091 | 1510.855 | 1570.35 | 1174.94 | 796.0059 | 3236.501 |
| mutton | 0.7411 | 1.5731 | 0.7705 | 1.0041 | 0.7213 | 1.1618 | 1.0328 | 1.5154 | 1.0218 | 1.0006 | 1747.918 | -11.2887 | 1517.567 | 1576.757 | 1182.568 | 797.5314 | 3234.975 |
| mutton | 0.7503 | 1.5124 | 0.7784 | 1.0009 | 0.7289 | 1.1566 | 1.0272 | 1.5748 | 1.0197 | 1.0019 | 1781.784 | -11.2887 | 1530.077 | 1580.723 | 1189.28 | 801.1926 | 3238.026 |
| mutton | 0.7811 | 1.576 | 0.8139 | 1.0025 | 0.7711 | 1.1396 | 1.0329 | 1.3155 | 1.0225 | 1.0006 | 1819.922 | -11.5938 | 1541.06 | 1585.605 | 1192.941 | 802.1079 | 3238.026 |
| mutton | 0.7514 | 1.6152 | 0.7839 | 1.0007 | 0.7391 | 1.155 | 1.0396 | 1.3808 | 1.0233 | 1.002 | 1850.126 | -11.5938 | 1557.841 | 1590.486 | 1202.704 | 807.5997 | 3239.857 |
| mutton | 0.7816 | 1.5554 | 0.8053 | 1.003 | 0.7585 | 1.137 | 1.0348 | 1.4075 | 1.0237 | 1.0013 | 1884.298 | -18.6111 | 1564.858 | 1593.842 | 1203.62 | 806.3793 | 3239.857 |
| mutton | 0.7648 | 1.5861 | 0.7995 | 1.0018 | 0.7525 | 1.1444 | 1.0346 | 1.2061 | 1.0208 | 1.0021 | 1944.402 | -13.4244 | 1589.876 | 1603.911 | 1212.773 | 813.7017 | 3239.247 |
| mutton | 0.7799 | 1.5896 | 0.8035 | 1.0028 | 0.7583 | 1.1407 | 1.0379 | 1.4022 | 1.0247 | 1.0018 | 1974.607 | -12.5091 | 1602.995 | 1606.962 | 1220.4 | 812.7864 | 3238.026 |
| mutton | 0.781 | 1.5078 | 0.807 | 1.0039 | 0.7586 | 1.1364 | 1.031 | 1.4227 | 1.0203 | 1.002 | 2003.897 | -9.153 | 1613.674 | 1615.505 | 1222.231 | 819.1935 | 3241.382 |
| mutton | 0.7584 | 1.577 | 0.7846 | 1.0034 | 0.738 | 1.1493 | 1.0338 | 1.4863 | 1.023 | 1.0026 | 2033.186 | -10.0683 | 1627.098 | 1624.047 | 1231.079 | 817.9731 | 3241.993 |
| mutton | 0.7436 | 1.5089 | 0.7689 | 1.0039 | 0.719 | 1.1703 | 1.0293 | 1.5414 | 1.0214 | 1.0042 | 2087.189 | -15.255 | 1647.54 | 1635.946 | 1235.96 | 823.1598 | 3241.993 |

Table 4 Principle components extracted and used for predictive model – used for calibration

| name | Prin1 | Prin2 | Prin3 | Prin4 | Prin5 | Prin1 | Prin2 | Prin3 | Prin4 | Prin5 | Prin6 | content of pork/ % |
| --- | --- | --- | --- | --- | --- | --- | --- | --- | --- | --- | --- | --- |
| mutton | -1.67887 | -2.52255 | 0.288613 | 0.119848 | 0.610433 | 1.087274 | -1.59585 | 2.166117 | 0.147331 | -0.48316 | -0.9832 | 0 |
| mutton | -1.33016 | -2.36246 | 0.284198 | -0.16786 | 0.610251 | 2.262232 | -0.56926 | 2.29944 | 0.988349 | 0.294395 | -0.01065 | 0 |
| mutton | -0.71548 | -2.07581 | 0.15925 | -0.75241 | 0.374263 | 1.27232 | -0.25034 | 1.5828 | 1.842147 | -0.67234 | -0.02869 | 0 |
| mutton | -0.46246 | -1.3443 | 0.235721 | -0.67423 | 0.541632 | 1.59448 | 0.004975 | 0.165096 | 0.615771 | -0.5631 | 0.411355 | 0 |
| mutton | -0.25542 | -1.32182 | 0.24432 | -1.03284 | 0.604952 | 2.670749 | 0.033262 | 2.316341 | 0.752095 | 0.201277 | -0.13654 | 0 |
| mutton | -0.09141 | -1.08878 | 0.274957 | -0.94052 | 0.497202 | 1.340186 | 0.094866 | 1.54649 | 0.657933 | -0.1841 | -0.16129 | 0 |
| mutton | 0.399435 | -0.91725 | 0.270747 | -0.9932 | 0.308088 | 2.314021 | 0.217283 | 2.08699 | 1.319284 | 0.233767 | -0.27839 | 0 |
| mutton | 0.701097 | -0.62898 | 0.264846 | -1.07709 | 0.283781 | 2.134036 | 0.330248 | 2.798092 | -1.16122 | 0.016895 | -0.52213 | 0 |
| mutton | 0.867548 | -0.58121 | 0.332238 | -1.14375 | 0.284173 | 1.271882 | 0.349065 | 2.037062 | 0.131495 | -0.28011 | -0.0378 | 0 |
| mutton | 0.993583 | -0.35818 | 0.289802 | -1.04506 | 0.294677 | 1.546269 | 0.43322 | 1.299269 | -1.26077 | -0.06303 | 0.195758 | 0 |
| mutton | 1.310643 | -0.04366 | 0.28984 | -1.047 | 0.308203 | 2.263099 | 0.587174 | 2.420109 | -1.17848 | 0.1129 | 0.324293 | 0 |
| mutton | 1.412289 | 0.036385 | 0.208541 | -1.11083 | 0.291982 | 1.302365 | 0.604167 | 1.796018 | 0.786421 | -0.16659 | -0.80287 | 0 |
| mutton | 1.697325 | 0.249341 | 0.324054 | -1.19762 | 0.263656 | 1.697284 | 0.686949 | 1.987328 | 0.152131 | -0.0007 | 0.303226 | 0 |
| mutton | 1.850914 | 0.338495 | 0.376652 | -1.29793 | 0.300499 | 2.039835 | 0.826165 | 2.351619 | 0.493717 | 0.168258 | 0.229815 | 0 |
| mutton | 2.096585 | 0.694871 | 0.367432 | -1.18896 | 0.336643 | 2.227703 | 1.067453 | 1.428969 | 0.284226 | -0.21032 | 0.205253 | 0 |
| mutton | 2.347874 | 0.86531 | 0.331107 | -1.27386 | 0.303807 | 2.230405 | 1.557081 | 0.202627 | 0.243254 | -0.35041 | 0.286902 | 0 |
| 40% of pork | 0.897184 | -1.72388 | 0.697982 | 2.181494 | 0.339308 | -0.2799 | -2.26038 | 0.67762 | -0.21778 | 0.054745 | -0.38561 | 20 |
| 40% of pork | 0.875045 | -1.61514 | 0.668985 | 1.70724 | 0.235046 | -0.0909 | -1.5891 | 0.095253 | 0.632416 | -0.30524 | -0.16537 | 20 |
| 40% of pork | 1.082337 | -1.00605 | 0.401126 | 1.676396 | 0.139738 | -0.27446 | -0.99984 | -0.40114 | 0.335275 | -0.45758 | 0.105341 | 20 |
| 40% of pork | 1.46072 | -0.58535 | 0.587312 | 1.530145 | 0.092702 | -0.11514 | -0.65737 | 0.07378 | -0.28431 | -0.10925 | -0.3545 | 20 |
| 40% of pork | 1.354791 | -0.42163 | 0.605458 | 1.322515 | 0.097833 | 0.206874 | -0.62818 | 0.319434 | -0.78448 | 0.076561 | 0.069483 | 20 |
| 40% of pork | 1.66105 | -0.36202 | 0.774953 | 0.858079 | -0.01795 | 0.172442 | -0.58948 | -0.14755 | 0.497262 | -0.33094 | 0.001737 | 20 |
| 40% of pork | 1.697366 | -0.05623 | 0.700141 | 0.971756 | -0.0094 | 0.067136 | -0.22063 | 0.197895 | -0.34421 | -0.17266 | -0.02718 | 20 |
| 40% of pork | 1.969866 | 0.118734 | 0.851438 | 0.840642 | -0.05273 | -0.06118 | -0.20259 | 0.432805 | 0.402446 | -0.09202 | -0.01267 | 20 |
| 40% of pork | 2.386757 | 0.513942 | 1.028298 | 0.427753 | -0.03132 | -0.46808 | -0.04502 | -0.19192 | 0.052701 | -0.23525 | -0.18606 | 20 |
| 40% of pork | 2.039386 | 0.598218 | 0.642437 | 1.16563 | 0.037775 | -0.34277 | 0.144029 | -0.19527 | -0.86937 | -0.21589 | -0.06274 | 20 |
| 40% of pork | 2.146939 | 0.698748 | 0.818774 | 0.858731 | 0.018928 | 0.229902 | 0.555018 | 0.267005 | -0.20638 | -0.03454 | -0.16772 | 20 |
| 40% of pork | 2.475453 | 0.980216 | 0.84406 | 0.628994 | 0.038006 | 0.216919 | 0.610632 | 0.14887 | -1.14531 | -0.07774 | -0.14509 | 20 |
| 40% of pork | 2.594273 | 1.020116 | 1.120329 | 0.441134 | 0.006354 | 0.091051 | 0.623306 | -0.07036 | 0.415875 | -0.38105 | -0.41912 | 20 |
| 40% of pork | 2.618572 | 1.39484 | 1.112827 | 0.748734 | 0.041759 | 0.53679 | 1.111907 | 0.453284 | 0.05349 | -0.0701 | -0.60233 | 20 |
| 40% of pork | 2.767259 | 1.576263 | 1.318497 | 0.472007 | 0.088667 | -0.10903 | 1.225827 | -0.46041 | -0.01213 | -0.3486 | -0.23262 | 20 |
| 40% of pork | 2.971555 | 1.856373 | 1.369801 | 0.428126 | 0.135741 | 0.487904 | 1.36174 | 0.129692 | 0.656986 | -0.17756 | -0.07617 | 20 |
| 40% of pork | 0.004592 | -2.63214 | 0.043272 | 0.715894 | -0.06414 | -1.25301 | -2.67505 | -0.14852 | -0.54907 | 0.072723 | -0.30777 | 40 |
| 40% of pork | 0.152856 | -2.15814 | -0.13064 | 0.732072 | -0.02083 | -1.491 | -1.98339 | -0.35664 | -0.63168 | -0.05766 | -0.09584 | 40 |
| 40% of pork | 0.394273 | -2.03789 | -0.16131 | 0.029656 | -0.20645 | -3.35604 | -1.28366 | -0.58875 | -0.46772 | -0.75158 | 0.210495 | 40 |
| 40% of pork | 0.656121 | -1.56982 | 0.094351 | -0.12476 | -0.24719 | -1.83552 | -1.17385 | -0.21063 | -0.59019 | -0.11958 | -0.14782 | 40 |
| 40% of pork | 0.77314 | -1.3375 | 0.119753 | -0.08827 | -0.27945 | -0.2831 | -1.10429 | 0.000774 | -0.4288 | 0.101859 | -0.38863 | 40 |
| 40% of pork | 0.929321 | -1.19123 | 0.134917 | -0.13024 | -0.3058 | -2.29333 | -0.90559 | -0.43675 | 0.630274 | -0.03248 | -0.17833 | 40 |
| 40% of pork | 1.186549 | -0.91214 | 0.146184 | -0.33113 | -0.25789 | -1.0832 | -0.75354 | -0.49366 | 0.798535 | -1.02545 | 0.500935 | 40 |
| 40% of pork | 1.638253 | -0.3932 | 0.257975 | -0.46209 | -0.32645 | -1.17069 | 0.283519 | -0.26971 | 0.606415 | -0.2476 | 0.231976 | 40 |
| 40% of pork | 1.450763 | -0.38876 | 0.196944 | -0.32456 | -0.30399 | -1.34527 | 0.709576 | -0.5291 | -1.15934 | -0.08836 | -0.3936 | 40 |
| 40% of pork | 1.489632 | -0.17836 | -0.04181 | 0.223318 | -0.24523 | -0.26868 | 0.775963 | -0.50637 | 0.789898 | 0.293624 | -0.00858 | 40 |
| 40% of pork | 1.850038 | -0.10143 | 0.362508 | -0.48852 | -0.34591 | -0.75566 | 0.904012 | -1.27623 | 0.455667 | -0.14749 | -0.33632 | 40 |
| 40% of pork | 2.047968 | 0.173356 | 0.304727 | -0.55196 | -0.22618 | -0.90254 | 1.264151 | -0.10868 | -1.0286 | -0.33529 | 0.301 | 40 |
| 40% of pork | 2.342829 | 0.367759 | 0.617433 | -0.64518 | -0.29025 | -0.65658 | 1.413707 | 0.104648 | 0.590715 | 0.205371 | 0.258668 | 40 |
| 40% of pork | 2.185619 | 0.402115 | 0.50789 | -0.46056 | -0.24774 | 0.701596 | 1.47863 | -0.49846 | 1.052359 | 0.409842 | -0.21925 | 40 |
| 40% of pork | 2.191198 | 0.67638 | 0.171778 | -0.01609 | -0.18732 | -2.78387 | 2.032549 | 0.855048 | -0.08446 | 0.514035 | 0.049625 | 40 |
| 40% of pork | 2.673313 | 0.690269 | 0.771643 | -0.68759 | -0.24678 | -1.50565 | 2.19365 | -1.10856 | 0.110629 | -0.20633 | -0.09597 | 40 |
| 60% of pork | -1.28856 | -2.57068 | -0.86389 | 0.523927 | -0.20291 | -1.89651 | -2.61476 | -0.18813 | -0.9252 | 0.194908 | -0.27182 | 60 |
| 60% of pork | -1.18471 | -2.36071 | -0.9336 | 0.192717 | -0.17147 | -2.12854 | -1.68054 | -1.14202 | 1.326772 | -0.08263 | -0.23932 | 60 |
| 60% of pork | -0.58066 | -1.82244 | -1.04283 | -0.33473 | -0.30266 | -2.19726 | -1.12228 | -0.50464 | 0.07546 | -0.0512 | -0.0542 | 60 |
| 60% of pork | -0.45834 | -1.46945 | -1.07233 | -0.20223 | -0.25456 | -2.81546 | -0.79904 | -0.99343 | 0.162817 | -0.12663 | -0.29844 | 60 |
| 60% of pork | -0.29556 | -1.32465 | -1.04019 | -0.35933 | -0.2605 | -2.1181 | -0.78252 | 0.260232 | -1.1777 | 0.46354 | -0.34272 | 60 |
| 60% of pork | -0.21831 | -1.25304 | -0.98854 | -0.59488 | -0.25564 | -2.19995 | -0.51085 | -0.74578 | 0.169152 | -0.12926 | -0.04676 | 60 |
| 60% of pork | 0.306032 | -0.72445 | -0.90082 | -0.72346 | -0.34415 | -2.16052 | -0.21299 | -0.92708 | -0.17736 | -0.28133 | -0.11825 | 60 |
| 60% of pork | -0.18963 | -0.63435 | -1.24707 | -0.05647 | -0.23148 | -1.49515 | -0.20526 | -1.32785 | 0.620066 | -0.34396 | -0.16202 | 60 |
| 60% of pork | 0.754205 | -0.16836 | -0.7056 | -0.75823 | -0.35403 | -1.26016 | 0.145291 | -0.1417 | 0.052411 | 0.574467 | -0.23973 | 60 |
| 60% of pork | 0.579213 | -0.16274 | -0.72674 | -0.66523 | -0.27326 | -1.82297 | 0.268473 | -0.62788 | 0.28127 | -0.04507 | -0.05097 | 60 |
| 60% of pork | 0.40243 | 0.102255 | -1.19622 | 0.132715 | -0.25962 | -0.56248 | 0.674318 | -0.37621 | 0.813803 | 0.131684 | -0.30842 | 60 |
| 60% of pork | 0.37229 | 0.167157 | -1.03444 | -0.01774 | -0.20448 | -1.90168 | 0.743169 | -0.86988 | 0.096623 | -0.04279 | -0.07807 | 60 |
| 60% of pork | 0.996133 | 0.254011 | -0.87053 | -0.60997 | -0.28559 | -1.74139 | 1.081263 | -0.59264 | -0.45906 | 0.105196 | -0.38009 | 60 |
| 60% of pork | 1.352768 | 0.6246 | -0.44432 | -0.71377 | -0.27772 | -1.12297 | 1.358923 | -0.91244 | 0.257434 | 0.143489 | -0.38899 | 60 |
| 60% of pork | 1.680999 | 0.727476 | -0.35421 | -0.81292 | -0.29413 | -1.53295 | 1.524831 | -0.63897 | -0.33123 | 0.075616 | -0.21139 | 60 |
| 60% of pork | 1.129552 | 1.000924 | -0.75694 | -0.14212 | -0.25237 | -1.40161 | 3.972748 | -1.52679 | 1.28837 | -0.10516 | -0.19281 | 60 |
| 80% of pork | -2.50411 | -1.26562 | -0.62506 | 0.645641 | 0.014565 | -2.80829 | -0.97498 | 0.189569 | -0.27744 | 0.471707 | 0.003807 | 80 |
| 80% of pork | -2.81419 | -1.23594 | -0.85421 | 1.208059 | 0.064807 | -4.38759 | -0.8933 | 0.917778 | 0.135433 | 0.445797 | 0.550426 | 80 |
| 80% of pork | -1.9846 | -0.81037 | -0.81741 | 0.494987 | 0.021233 | -3.03879 | -0.78652 | 0.216554 | -0.0459 | 0.241065 | 0.251161 | 80 |
| 80% of pork | -1.71091 | -0.09533 | -1.04999 | 0.733253 | 0.068285 | -2.75231 | -0.6963 | -0.09792 | -0.11232 | 0.139248 | 0.174538 | 80 |
| 80% of pork | -1.35668 | 0.04056 | -0.86296 | 0.423918 | 0.00103 | -2.46321 | -0.68827 | 0.160251 | 0.062996 | 0.491793 | 0.039105 | 80 |
| 80% of pork | -1.39661 | 0.041408 | -0.77173 | 0.669375 | 0.069442 | -2.67797 | -0.64462 | 0.0803 | 0.27091 | 0.547209 | 0.045502 | 80 |
| 80% of pork | -0.82935 | 0.365471 | -0.86108 | 0.228345 | 0.006452 | -2.66374 | -0.45327 | -0.09805 | -0.00385 | 0.25968 | 0.038315 | 80 |
| 80% of pork | -0.74492 | 0.5872 | -0.82876 | 0.316847 | -0.02183 | -2.39133 | -0.42114 | 0.223801 | -0.27891 | 0.6168 | 0.072405 | 80 |
| 80% of pork | -0.44341 | 0.97855 | -0.67737 | 0.588433 | 0.003856 | -2.57268 | -0.39745 | -0.14065 | 0.65625 | 0.259111 | 0.215918 | 80 |
| 80% of pork | -0.69182 | 1.028538 | -0.8752 | 0.752736 | 0.006172 | -2.39496 | -0.2884 | 0.4972 | -0.3009 | 0.413273 | 0.296086 | 80 |
| 80% of pork | -0.22224 | 1.130215 | -0.79718 | 0.509994 | 0.022888 | -2.65489 | -0.02933 | -0.05763 | -1.31461 | 0.195446 | -0.02011 | 80 |
| 80% of pork | 0.059511 | 1.312348 | -0.80531 | 0.503416 | 0.011978 | -4.09295 | 0.066509 | 0.586176 | -0.20582 | -0.67783 | 0.983263 | 80 |
| 80% of pork | 0.304331 | 1.624013 | -0.65409 | 0.678821 | 0.009273 | -2.80391 | 0.108043 | -0.3862 | 0.923556 | -0.18365 | 0.511622 | 80 |
| 80% of pork | 0.459085 | 1.710969 | -0.48748 | 0.631132 | 0.050324 | -2.02306 | 1.245674 | -0.05366 | -0.83318 | 0.4257 | -0.03613 | 80 |
| 80% of pork | 0.077315 | 1.723283 | -0.91319 | 0.895306 | 0.026284 | -5.05589 | 1.476856 | 0.268127 | -0.70039 | 0.20343 | 0.334346 | 80 |
| 80% of pork | 0.583495 | 2.019418 | -0.70781 | 0.831272 | 0.051682 | -4.77416 | 1.903012 | 0.478638 | -0.4067 | 0.132083 | 0.729618 | 80 |
| pork | -5.94184 | 0.147443 | 3.203018 | -0.23103 | -0.41689 | 4.552134 | -2.08765 | -0.47371 | -0.07017 | 0.384186 | 0.320788 | 100 |
| pork | -6.49951 | 0.164209 | 4.049918 | 0.194515 | -0.585 | 2.594898 | -2.0327 | -1.10702 | -1.78646 | -0.66783 | 0.162698 | 100 |
| pork | -5.60169 | 0.443049 | 2.390769 | -0.19667 | -0.27253 | 6.554843 | -1.56601 | -0.14635 | 1.794 | 1.157162 | 0.345924 | 100 |
| pork | -4.14614 | 0.662124 | 0.790943 | -0.59714 | -0.0707 | 3.742496 | -0.95232 | -0.64555 | -0.30823 | 0.109492 | 0.170858 | 100 |
| pork | -3.6239 | 0.853802 | 0.231723 | -0.57304 | 0.014084 | 4.072186 | -0.94209 | -0.82274 | 1.091185 | 0.054697 | 0.344124 | 100 |
| pork | -4.60545 | 0.899714 | 0.871952 | -0.23122 | -0.00827 | 4.10192 | -0.93571 | -1.08757 | -1.25803 | 0.000449 | 0.017299 | 100 |
| pork | -3.51602 | 1.002038 | 0.098567 | -0.48565 | 0.074184 | 4.433865 | -0.45229 | -1.20602 | 1.178857 | -0.03782 | 0.211686 | 100 |
| pork | -2.91139 | 1.259182 | -0.39669 | -0.26169 | 0.112336 | 4.561471 | -0.1941 | -0.9146 | -0.46497 | 0.226465 | 0.070701 | 100 |
| pork | -3.33147 | 1.259213 | -0.40844 | -0.14053 | 0.110097 | 4.799764 | -0.08147 | -1.10807 | 0.374611 | -0.00135 | 0.089126 | 100 |
| pork | -2.67211 | 1.310883 | -0.4537 | -0.2561 | 0.10526 | 4.007459 | 0.119406 | -1.33421 | 1.406838 | 0.091547 | 0.090201 | 100 |
| pork | -1.82121 | 1.617348 | -0.87832 | -0.24741 | 0.164887 | 3.406294 | 0.24755 | -1.21123 | -0.47924 | 0.539345 | -0.33665 | 100 |
| pork | -1.66875 | 1.814045 | -0.89074 | 0.029366 | 0.171887 | 4.424117 | 0.418467 | -1.12159 | -1.25883 | -0.16758 | 0.084629 | 100 |
| pork | -2.06287 | 1.889926 | -0.92762 | 0.304422 | 0.217941 | 5.998354 | 0.468273 | -0.23176 | -2.15835 | 0.205421 | 0.176301 | 100 |
| pork | -1.83778 | 1.962072 | -1.1168 | 0.18263 | 0.271905 | 5.023545 | 0.787979 | -0.80477 | -1.26331 | 0.23205 | 0.039024 | 100 |
| pork | -1.01502 | 2.135178 | -0.91724 | 0.026684 | 0.16508 | 5.057758 | 1.064493 | -1.31029 | 1.046275 | 0.265545 | 0.247071 | 100 |
| pork | -1.23906 | 2.26977 | -1.09722 | 0.259662 | 0.204468 | 2.396655 | 1.31844 | -1.84619 | -1.00655 | -0.26158 | -0.26387 | 100 |

Table 5 Principle components extracted and used for predictive model – used for validation

| name | Prin1 | Prin2 | Prin3 | Prin4 | Prin5 | Prin1 | Prin2 | Prin3 | Prin4 | Prin5 | Prin6 | content of pork/ % |
| --- | --- | --- | --- | --- | --- | --- | --- | --- | --- | --- | --- | --- |
| mutton | -1.12023 | -2.14521 | 0.364558 | -0.47556 | 0.609332 | 1.300985 | -0.31447 | 1.318792 | -0.59459 | -0.40993 | 0.354918 | 0 |
| mutton | 0.251939 | -1.03032 | 0.236253 | -0.86334 | 0.300697 | 1.652823 | 0.190198 | 1.086249 | -0.82363 | -0.48604 | 0.17022 | 0 |
| mutton | 1.125802 | -0.23579 | 0.301517 | -1.09287 | 0.283516 | 2.466101 | 0.46533 | 1.229516 | -0.51258 | -0.25264 | 0.01126 | 0 |
| mutton | 1.94099 | 0.551329 | 0.370923 | -1.16896 | 0.267689 | 1.217636 | 1.057229 | 1.138345 | -0.23597 | -0.10131 | 0.075085 | 0 |
| 40% of pork | 0.949769 | -1.2572 | 0.587093 | 1.749402 | 0.158857 | 0.575224 | -1.2535 | 0.444693 | 1.05387 | -0.00817 | -0.00971 | 20 |
| 40% of pork | 1.438253 | -0.31204 | 0.567225 | 1.17712 | 0.024399 | 0.548834 | -0.50278 | 1.024101 | 0.228822 | -0.35263 | 0.181508 | 20 |
| 40% of pork | 2.032755 | 0.643679 | 0.762971 | 1.011958 | 0.069471 | -0.16142 | 0.538926 | -0.30303 | 0.393498 | -0.00608 | -0.255 | 20 |
| 40% of pork | 2.976146 | 1.464515 | 1.454388 | 0.13862 | 0.098295 | 0.361508 | 1.167315 | 0.26969 | 0.418449 | -0.1211 | -0.42608 | 20 |
| 40% of pork | 0.193107 | -2.12869 | 0.047314 | 0.308337 | -0.12308 | -3.19497 | -1.80944 | -0.01233 | 0.078596 | 0.112032 | -0.13894 | 40 |
| 40% of pork | 1.092053 | -0.93741 | 0.07506 | -0.11397 | -0.23481 | -1.31958 | -0.78585 | -0.48435 | 0.187051 | 0.051593 | -0.12314 | 40 |
| 40% of pork | 2.017549 | -0.12873 | 0.487922 | -0.71066 | -0.30412 | -0.49698 | 0.790007 | -0.12339 | -0.77972 | -0.03341 | 0.257358 | 40 |
| 40% of pork | 2.408944 | 0.605027 | 0.62008 | -0.56416 | -0.23027 | -1.70257 | 1.559902 | -0.40687 | 0.934922 | -0.07504 | 0.258575 | 40 |
| 60% of pork | -0.91885 | -2.16427 | -1.03761 | 0.014414 | -0.19629 | -2.2701 | -1.24455 | -0.96216 | 0.998353 | -0.08343 | -0.07299 | 60 |
| 60% of pork | 0.051112 | -0.89164 | -0.945 | -0.57313 | -0.33913 | -2.26482 | -0.25181 | -0.23119 | 0.126161 | 0.098074 | -0.11025 | 60 |
| 60% of pork | 0.899929 | 0.007247 | -0.66719 | -0.7228 | -0.29276 | -1.82646 | 0.516092 | -0.52304 | 0.362594 | 0.067519 | -5.7E-05 | 60 |
| 60% of pork | 1.535311 | 0.669893 | -0.39458 | -0.78199 | -0.2903 | -1.23681 | 1.515188 | -0.78178 | 0.731191 | 0.239879 | -0.15592 | 60 |
| 80% of pork | -2.25369 | -0.97194 | -0.69169 | 0.628739 | -0.00406 | -3.13353 | -0.79923 | -0.19869 | -0.00467 | -0.10687 | 0.188637 | 80 |
| 80% of pork | -1.19647 | 0.154988 | -0.80826 | 0.299346 | 0.019109 | -2.70751 | -0.47334 | -0.03504 | 0.065201 | 0.184949 | 0.262684 | 80 |
| 80% of pork | -0.4205 | 1.051619 | -0.70332 | 0.512594 | 0.036258 | -5.28816 | -0.24926 | 0.79148 | -0.47741 | 0.371427 | 0.468256 | 80 |
| 80% of pork | 0.351303 | 1.719871 | -0.63214 | 0.629816 | 0.043927 | -2.52533 | 1.324456 | 0.230373 | -1.15061 | 0.363179 | 0.054564 | 80 |
| pork | -5.16232 | 0.441096 | 1.721609 | -0.41591 | -0.20562 | 5.822857 | -1.63239 | -0.65504 | 0.975655 | 0.265734 | 0.452224 | 100 |
| pork | -3.98749 | 0.967939 | 0.386089 | -0.3427 | 0.018684 | 2.194307 | -0.51054 | -1.31557 | -0.2503 | -0.14051 | 0.023502 | 100 |
| pork | -2.53913 | 1.386639 | -0.49197 | -0.26667 | 0.127849 | 5.969864 | 0.245814 | -0.93474 | -0.54478 | 0.005231 | 0.318828 | 100 |
| pork | -1.42337 | 1.973307 | -0.87462 | 0.049696 | 0.148666 | 4.964635 | 0.916404 | -0.9652 | -1.75131 | 0.063477 | -0.07634 | 100 |
